# Supplementary material for: The disordered regions of the methyltransferase SETD2 govern its function by regulating its proteolysis and phase separation
Source: PubMed Central journal article supplement (PMC8405934; doi:10.1016/j.jbc.2021.101075), 2021-08-13
Supplement: mmc2.pdf [file mmc2.pdf]

The disordered regions of the methyltransferase SETD2 govern its function by regulating  
its proteolysis and phase separation

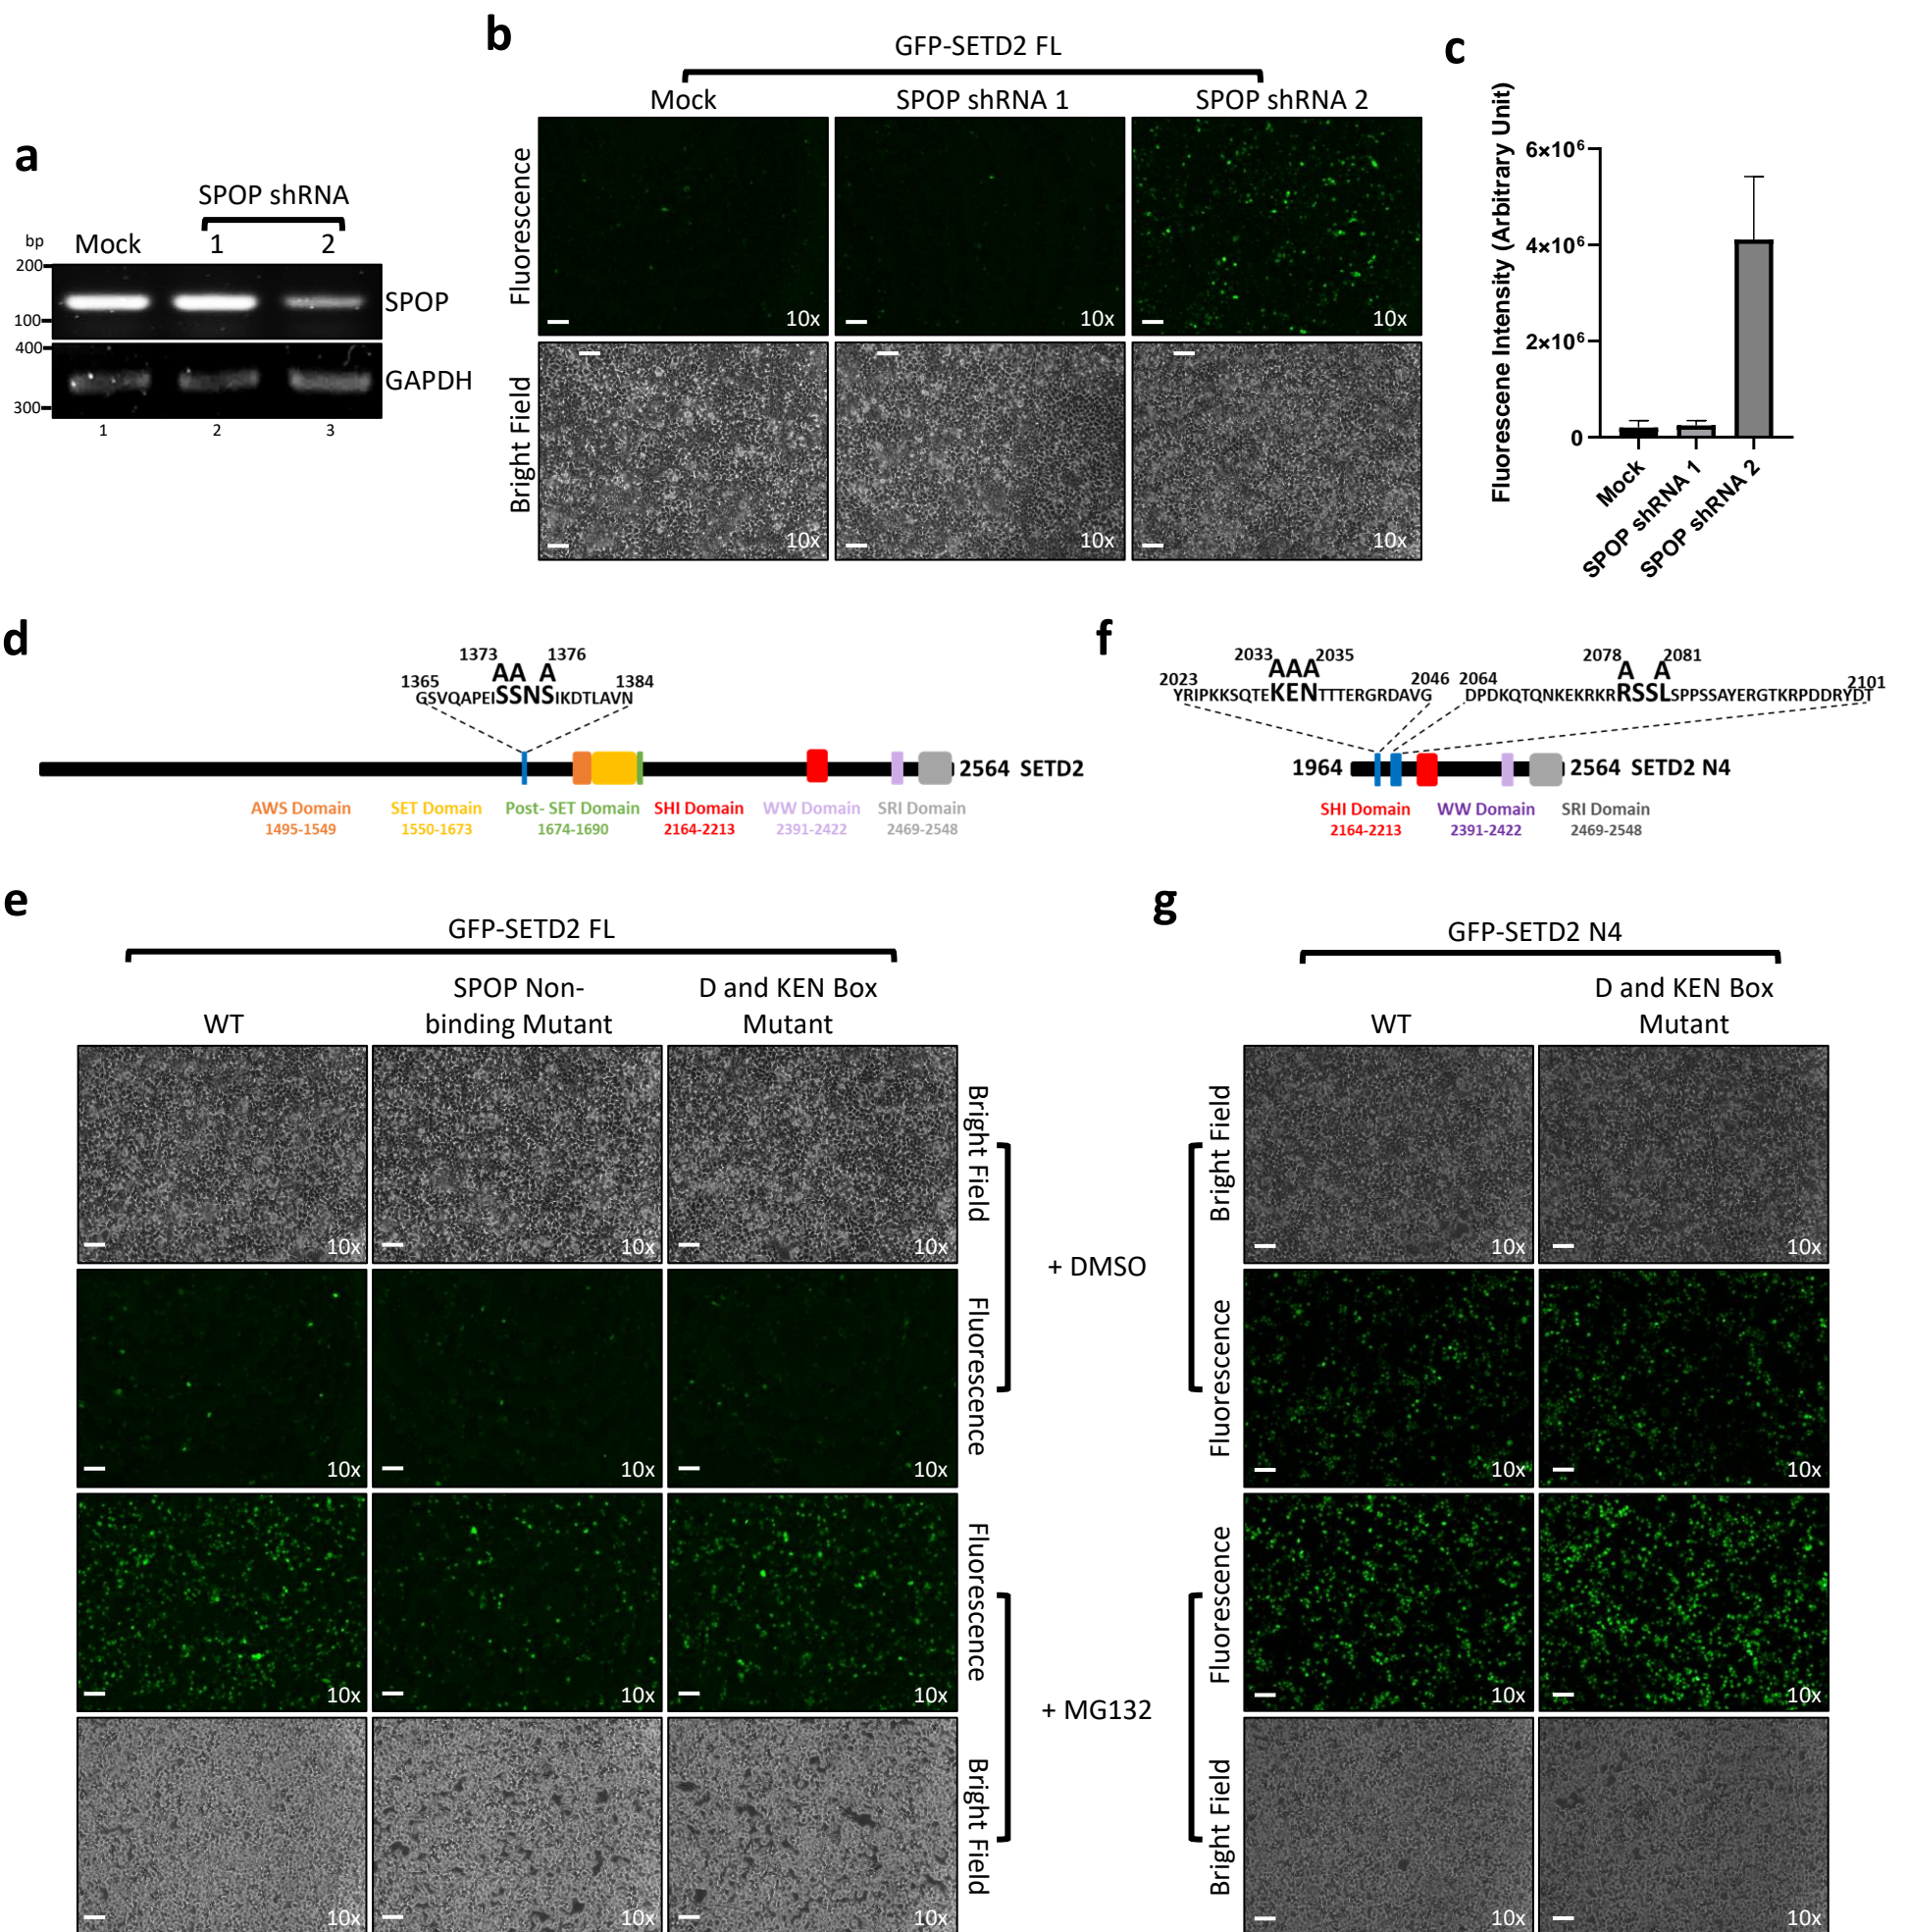

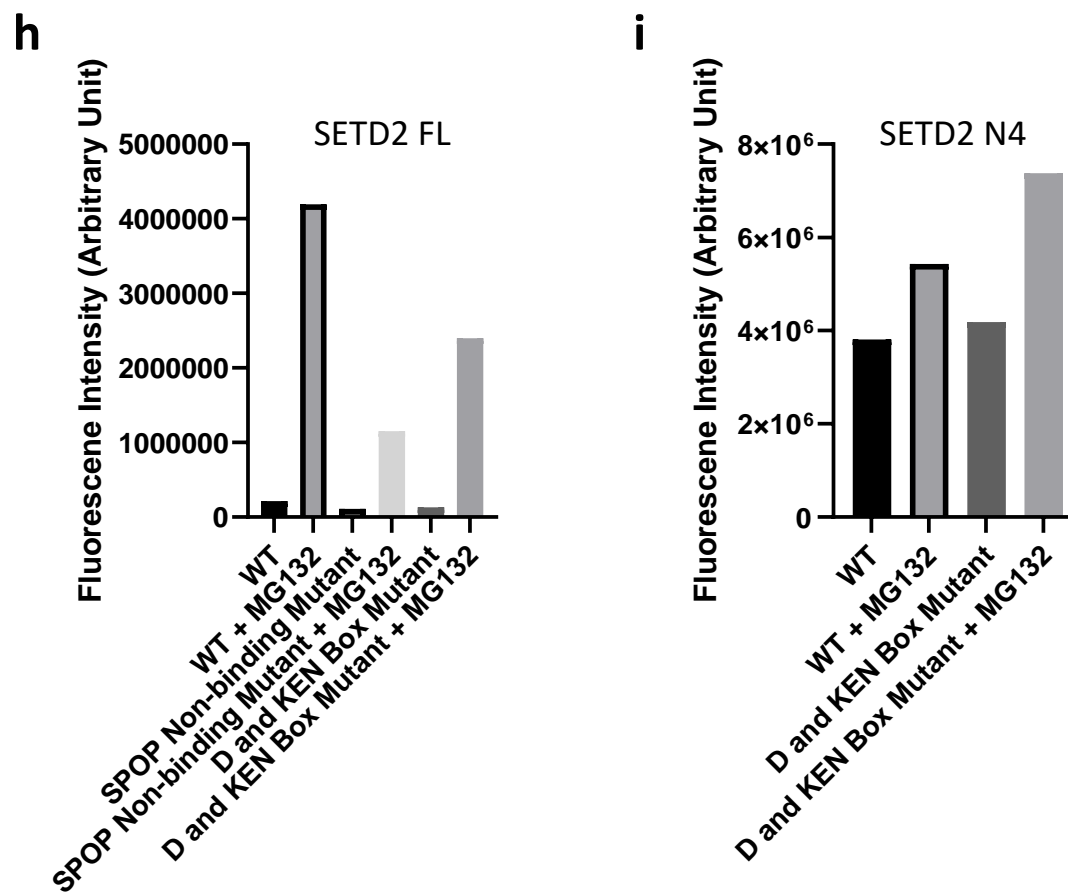

**Figure S1:** (a) RNA was isolated from GFP-SETD2 FL expressing 293T cells transfected with SPOP shRNA and RT-PCR was performed to check transcript levels. GAPDH was used as a normalization control. (b, c) Microscopy images and their quantification showing the effect of SPOP shRNA treatment on expression of GFP-SETD2 FL in 293T cells. The scale bar in is 1 mm. (d, f) Cartoon depicting the position and sequence of SPOP binding and putative D/KEN Box in SETD2 and the mutation introduced to disrupt those. (e, g, h, i) Microscopy images and their quantification showing expression of GFP-SETD2 constructs in 293T cells and the effect of MG132 treatment on their expression. The scale bar in is 1 mm. WT- Wild Type. Please note that the microscopy settings used to capture images in panels b, e and g were different to get clear pictures while avoiding saturation and thus, cannot be compared amongst themselves.

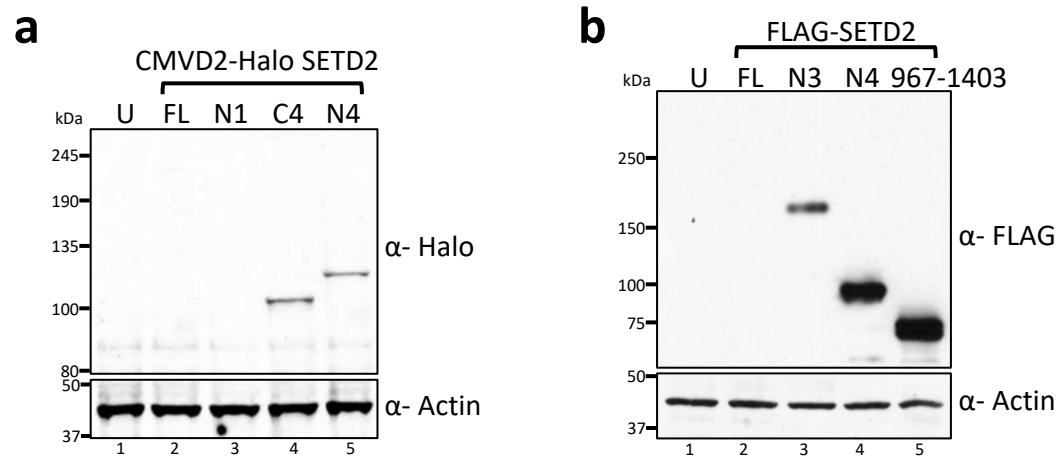

**Figure S2:** Western blot of whole-cell lysates of 293T cells expressing (a) Halo-tagged SETD2 constructs under CMVD2 promoter and (b) FLAG-tagged SETD2 constructs under CMV promoter.

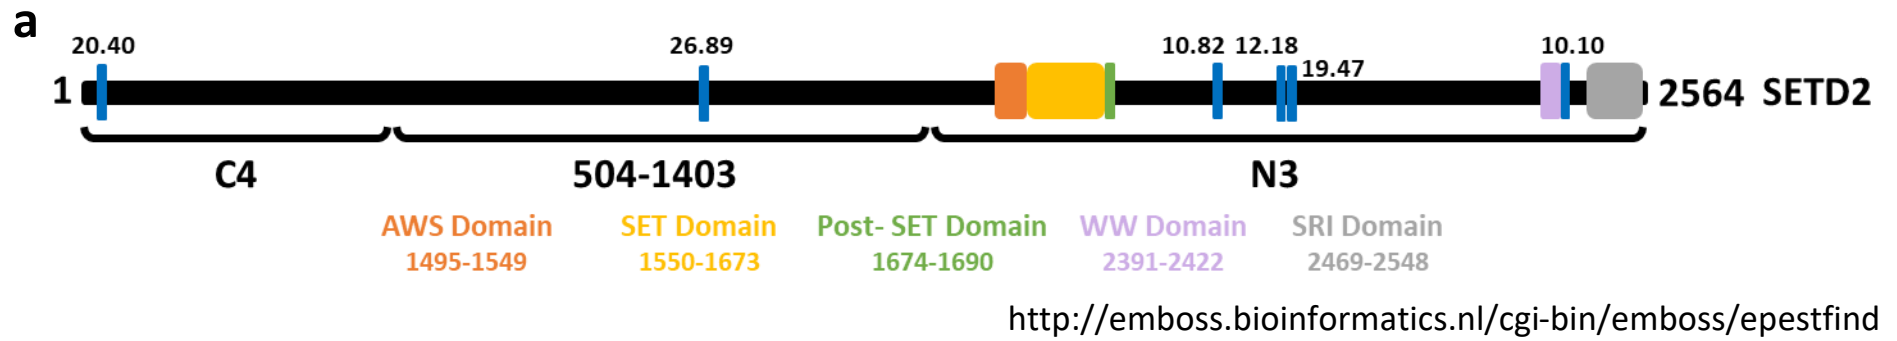

**b**

| Position  | Sequence                                            | Score |
|-----------|-----------------------------------------------------|-------|
| 20-31     | HPTPEEEENEAK                                        | 20.40 |
| 96-115    | KQSDTPNPPAVPLQVDSTPK                                | 5.17  |
| 117-134   | KMEIGDTLSTAEESPPK                                   | 8.87  |
| 169-216   | HAAPLPAVIAESTTVDSPPSSPPPPPPPAQ<br>ATLSSPAPVTEPVALPH | 9.62  |
| 1035-1063 | HEDYSGSSESSNDESSEDTSDDSSIPR                         | 26.89 |
| 1074-1089 | KNSTLPMEEETSPCSSR                                   | 6.78  |
| 1831-1850 | KTAVPPLSEGDGYSENTSR                                 | 5.5   |
| 1852-1863 | HTPLNTPDPSTK                                        | 8.28  |
| 1863-1874 | KLSTEADTDPK                                         | 10.82 |
| 1948-1963 | KLPTSEPEADAEIEPK                                    | 12.18 |
| 1969-1994 | KLEEPINEETPSQDEEEGVSDVESER                          | 19.47 |
| 2413-2433 | RQTQWDPPTWESPGDDASLEH                               | 10.12 |

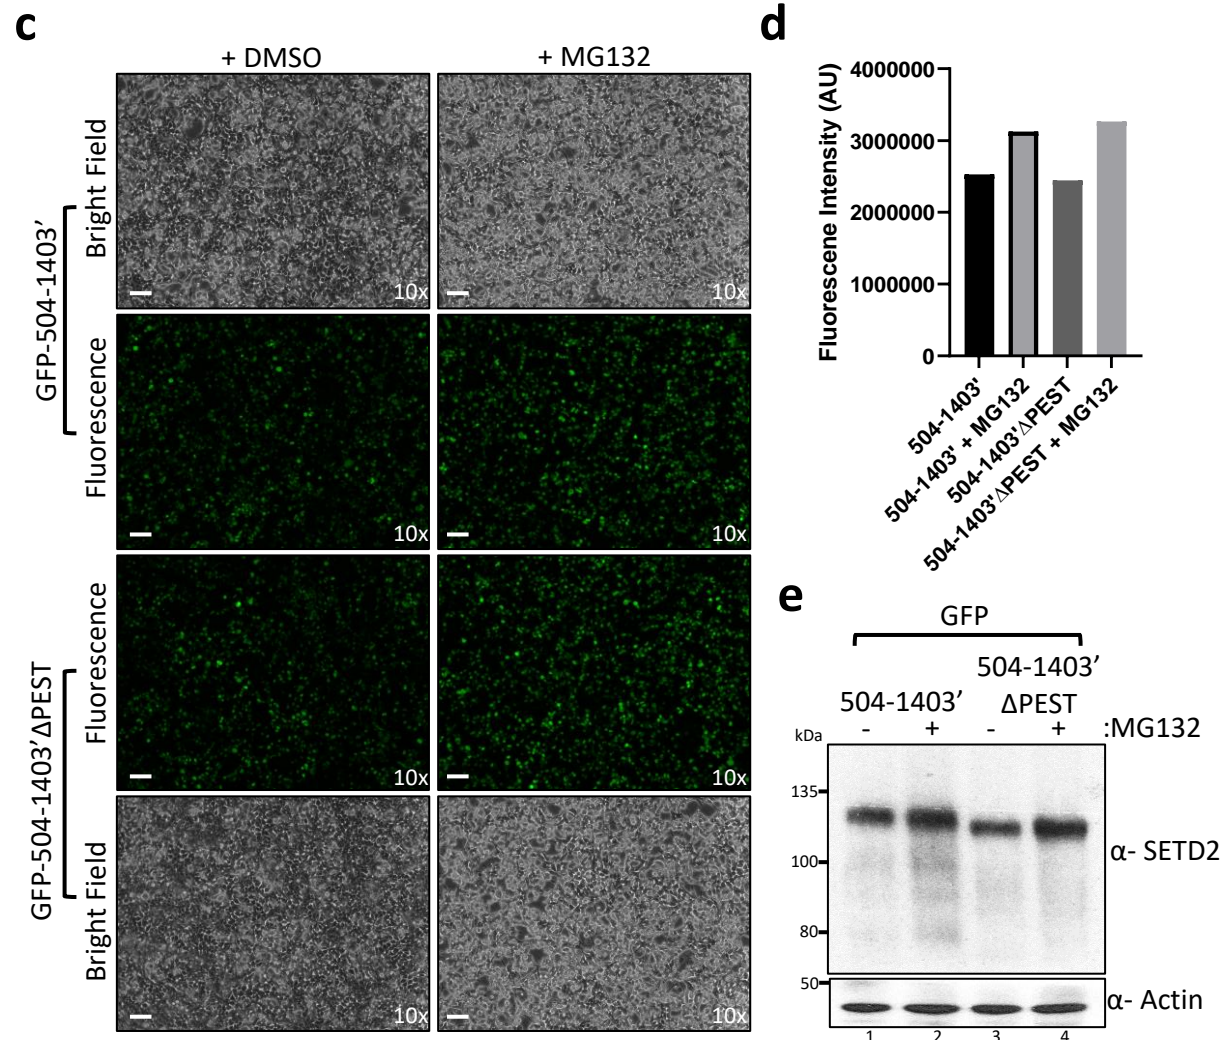

**Figure S3:** (a) Cartoon illustrating the location of PEST motifs in SETD2 of score >10 (>5 is considered significant). (b) Position, sequence and score of PEST motifs in SETD2. (c, d) Microscopy images and their quantification showing expression of GFP-SETD2 fragments. See text for more details. The scale bar in is 1 mm. (e) Western blot of whole-cell lysates of cells shown in (c) probed with the antibodies indicated.

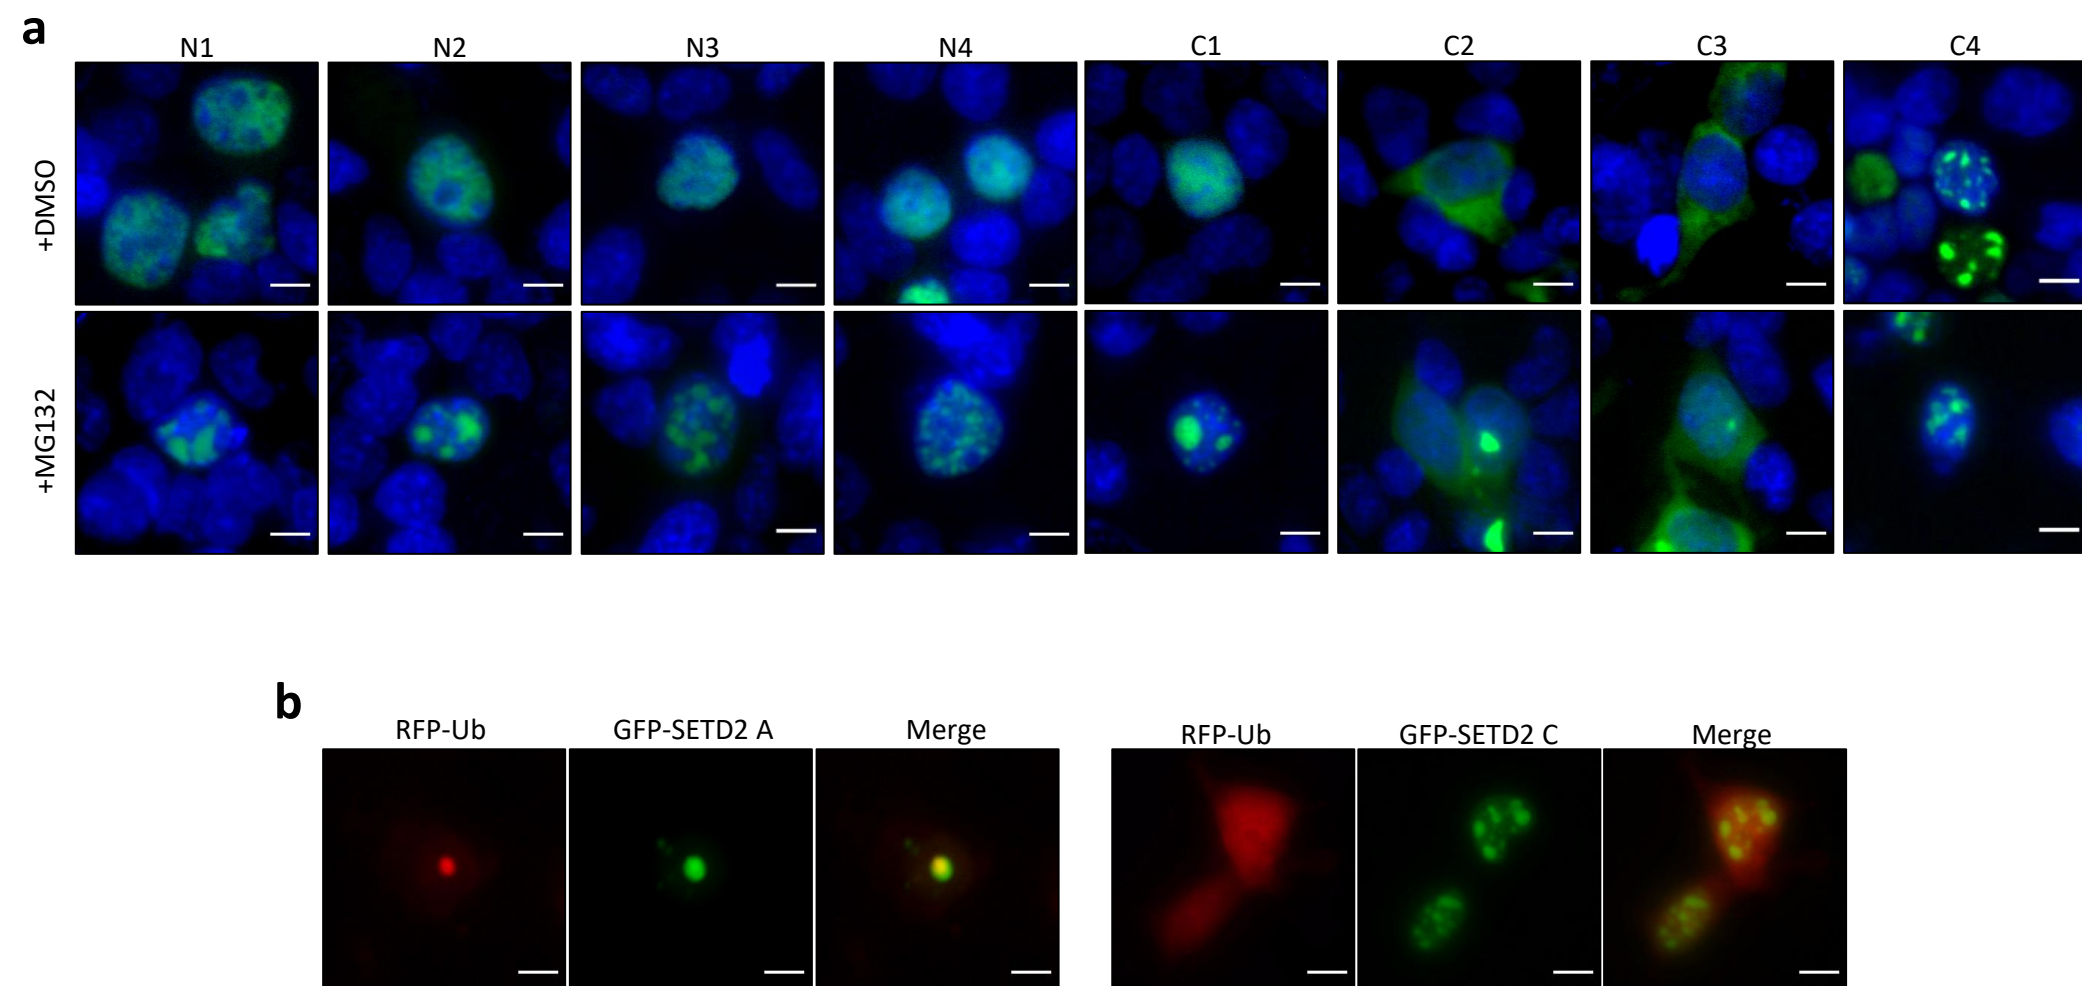

**Figure S4:** (a) Microscopy images showing that GFP-SETD2 truncations form puncta especially upon MG132 treatment. (b) Microscopy images showing the localization of RFP-Ub with GFP-SETD2 A and C. The scale bar is 10  $\mu$ m.

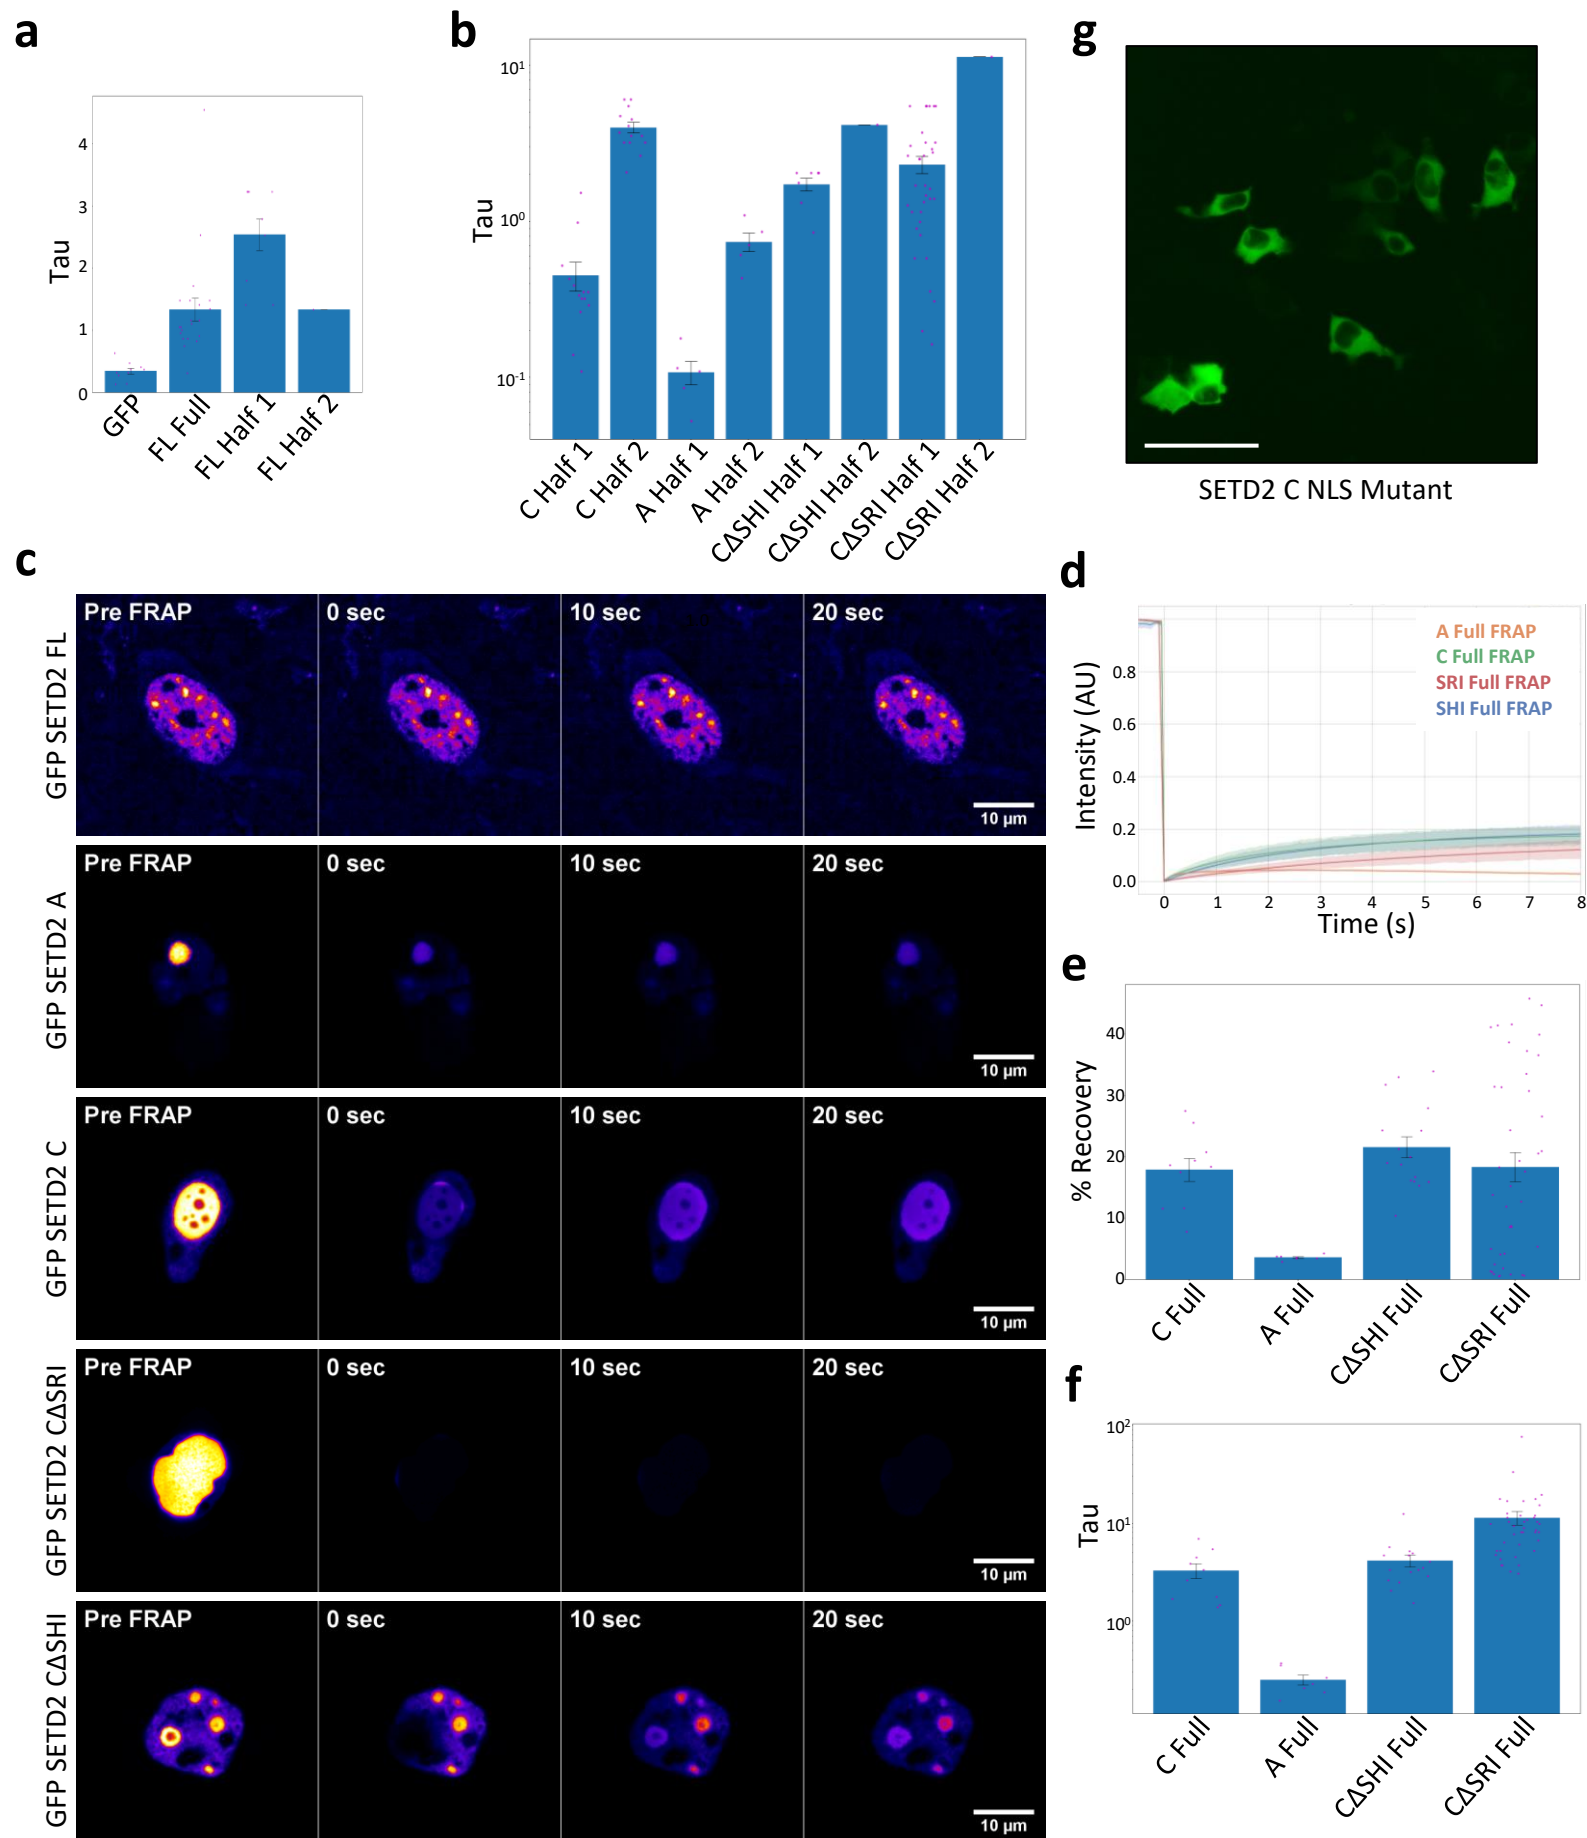

**Figure S5:** (a, b, d-f) Plots and bar graphs showing the recovery of fluorescence in the bleached region of interest and the Tau values calculated from the FRAP experiments. (c) Microscopy images showing different time points of the FRAP experiments. The scale bar is 10  $\mu\text{m}$ . (g) Microscopy image of NLS mutant of SETD2 C. The scale bar is 100  $\mu\text{m}$ .

| <b>Oligo</b>   | <b>Sequence (5'-3')</b>                                    |
|----------------|------------------------------------------------------------|
| SPOP_F         | TACCCTCTTCTGCGAGGTGA                                       |
| SPOP_R         | CGGGAATTCTCCACAGTCC                                        |
| GAPDH_F        | TTCGACAGTCAGCCGCATCTTCTT                                   |
| GAPDH_R        | CAGGCGCCCAATACGACCAAATC                                    |
| SPOP_shRNA_1 F | CCGGGATTCAAGAAATTCATCCGTAGATATCTACGGATGAATTTCTTGAATCTTTTTG |
| SPOP_shRNA_1 R | AATTCAAAAAGATTCAAGAAATTCATCCGTAGATATCTACGGATGAATTTCTTGAATC |
| SPOP_shRNA_2 F | CCGGTTCAGGCTCACAAGGCTATCGATATCGATAGCCTTGTGAGCCTGGAATTTTTG  |
| SPOP_shRNA_2 R | AATTCAAAAATTCCAGGCTCACAAGGCTATCGATATCGATAGCCTTGTGAGCCTGGAA |

**Figure S6:** Sequence of oligos used to perform RT-PCR and knockdown.
